# Supplementary material
Source: publisher figshare collection journal article supplement (https://karger.figshare.com/ndownloader/files/30807100)
Supplement: Supplementary file 1 [file 30807100]

Table 1S: Search strategy for other sources

| European Association of Urology | ((taguchi OR u-stich OR single stich OR one stitch) AND ureter) AND ((kidney OR renal) AND transplant) |
| --- | --- |
| American Urological Association | ((taguchi OR u-stich OR single stich OR one stitch) AND ureter) AND ((kidney OR renal) AND transplant) |
| The Transplantation Society | taguchi |
| Current controlled trials | taguchi |
| ClinicalTrials.gov | taguchi |
| Search portal of WHO | taguchi |
